# Supplementary material for: Polish is quantitatively different on quartzite flakes used on different worked materials
Source: PubMed Central journal article supplement (PMC7714215; doi:10.1371/journal.pone.0243295), 2020-12-03

Decision tree

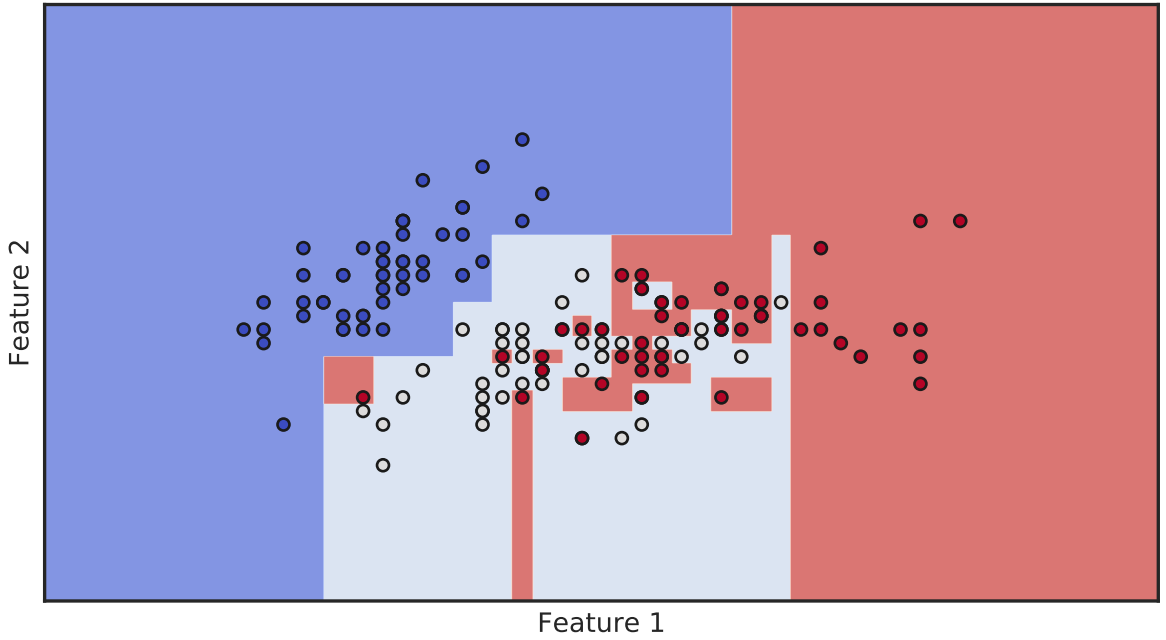

SVM with nonlinear kernel

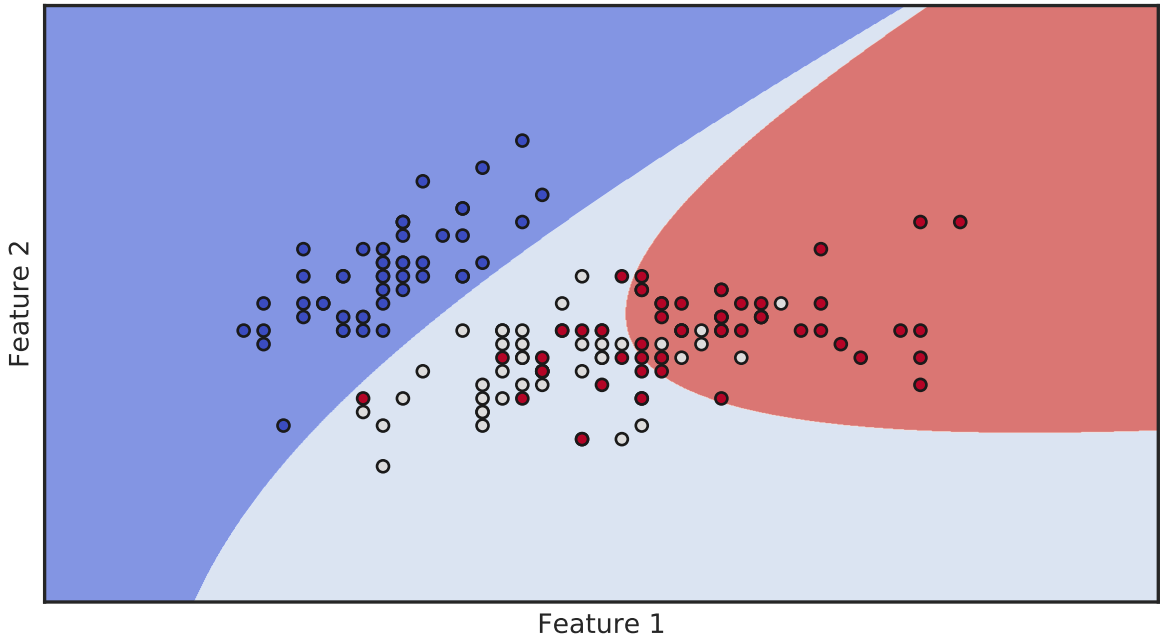

Supplement: pone.0243295.s004.pdf [file pone.0243295.s004.pdf]
