# Supplementary material for: Polish is quantitatively different on quartzite flakes used on different worked materials
Source: PubMed Central journal article supplement (PMC7714215; doi:10.1371/journal.pone.0243295), 2020-12-03

Performance on training set

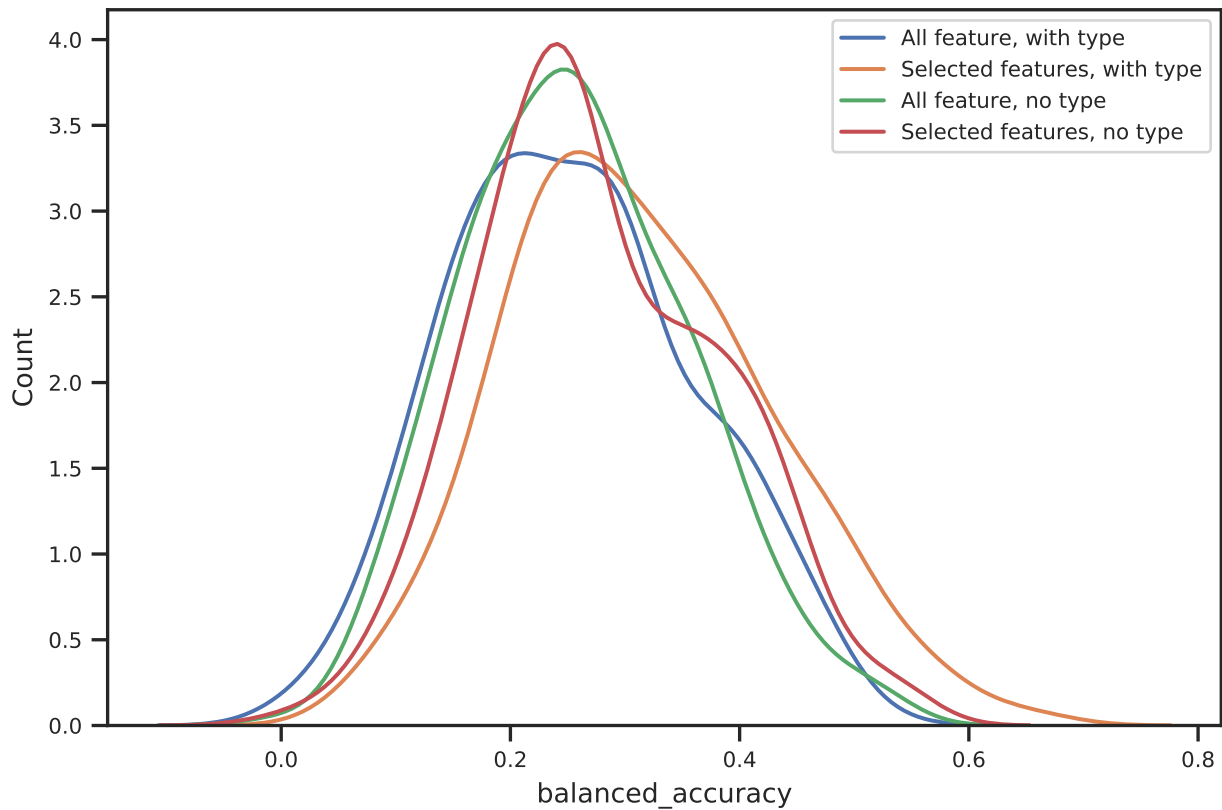

Supplement: pone.0243295.s005.pdf [file pone.0243295.s005.pdf]
