# Supplementary material for: Polish is quantitatively different on quartzite flakes used on different worked materials
Source: PubMed Central journal article supplement (PMC7714215; doi:10.1371/journal.pone.0243295), 2020-12-03

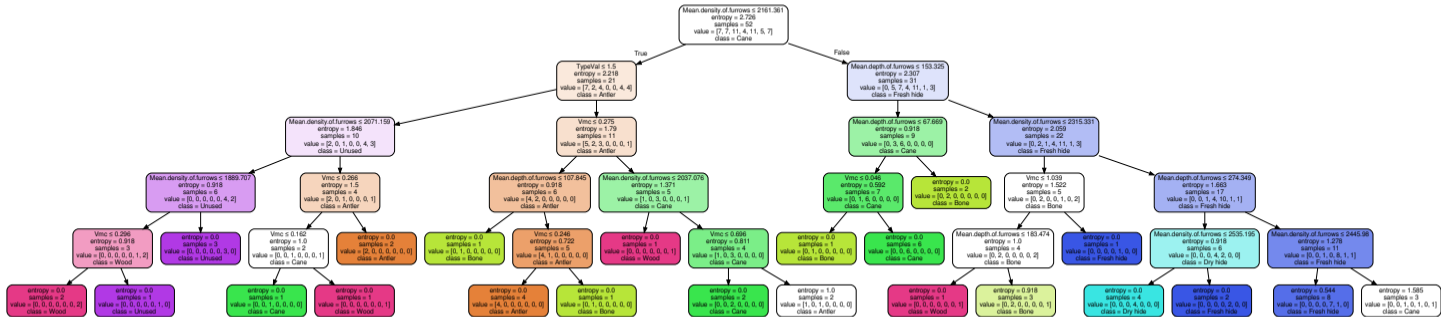

Supplement: pone.0243295.s010.pdf [file pone.0243295.s010.pdf]
